# Supplementary material for: Effects of Selenium on Chronic Kidney Disease: A Mendelian Randomization Study
Source: MDPI journal article supplement (doi:10.3390/nu14214458), 2022-10-23
Supplement: s1 [file s1]

## *Supplementary Material*

### Supplementary Figures

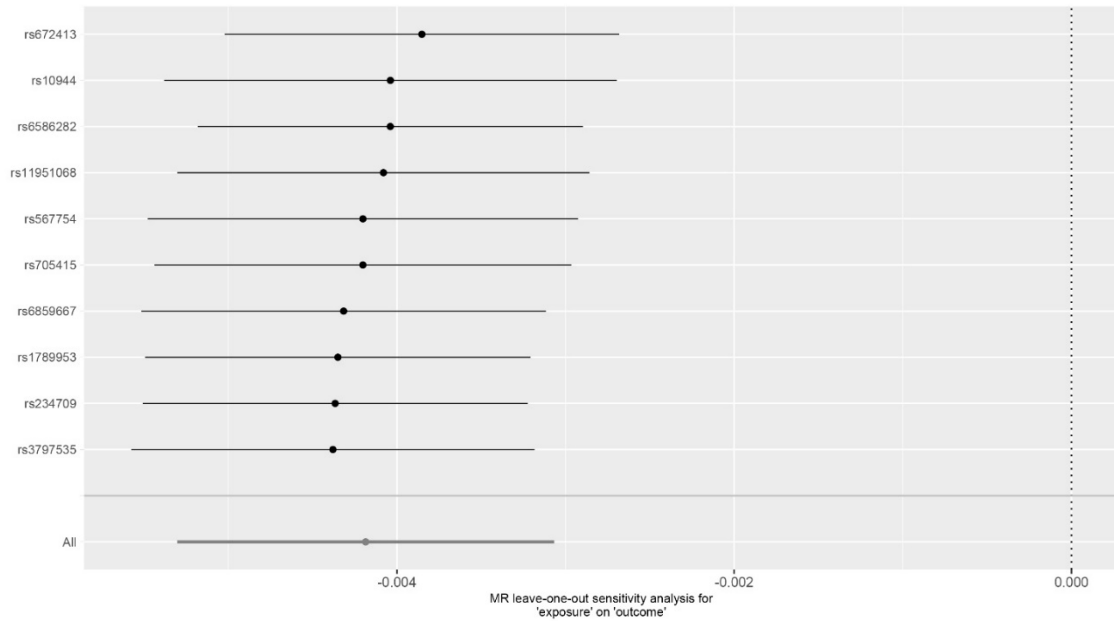

**Supplementary Figure S1.** The leave-one-out plot of the overall IVW estimate of all selenium levels-related SNPs on the risk of eGFR.

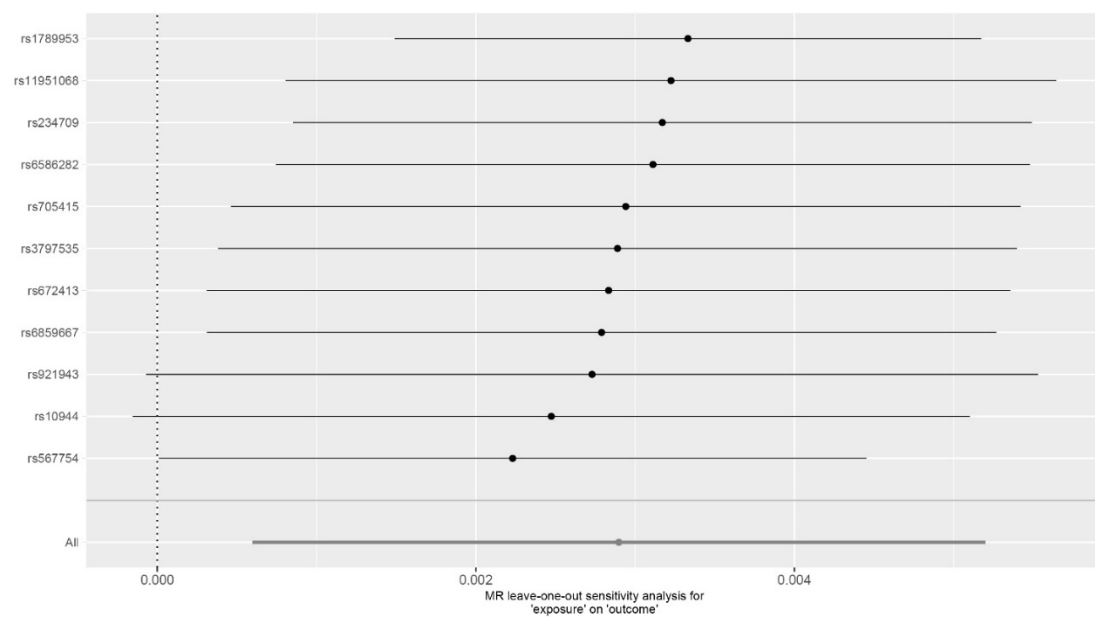

**Supplementary Figure S2.** The leave-one-out plot of the overall IVW estimate of all selenium levels-related SNPs on the risk of BUN.
